# Trends in Cognitive Function Pre- and Post- Stroke: Finding from the China Health and Retirement Longitudinal Study

1 **Jianian Hua<sup>1,2#\*</sup>, Jianye Dong<sup>2#</sup>, Yueping Shen PhD<sup>3,\*\*</sup>**

2 <sup>1</sup> Department of Neurology, The First Affiliated Hospital of Soochow University, Suzhou, Jiangsu,  
3 PR China.

4 <sup>2</sup> Medical College of Soochow University, Suzhou 215123, PR China.

5 <sup>3</sup> Department of Epidemiology and Biostatistics, School of Public Health, Medical College of  
6 Soochow University, 199 Renai Road, Suzhou, 215123, PR China.

7 <sup>#</sup>These authors contributed equally.

8 \*Correspondence:

9 Jianian Hua

10 [jninhua@foxmail.com](mailto:jninhua@foxmail.com)

11 \*\*Correspondence:

12 Yueping Shen

13 [shenyueping@suda.edu.cn](mailto:shenyueping@suda.edu.cn)

14

15

16

17

18

19

20

21

22

23

24

25

26

27

28

29

30

31

32

33 **Abstract**

34 Introduction: The magnitude of changes in cognitive function after stroke among the Chinese  
35 population is not clear. We aimed to learn the trajectories of cognitive function before and after  
36 incident stroke among Chinese participants.

37 Methods: Data were obtained from a nationally representative study. A total of 13311 Chinese  
38 participants aged 45 years or older and without a history of stroke were assessed at baseline between  
39 June 2011 and March 2012 and in at least one cognitive test between Wave 2 to Wave 4. Cognitive  
40 function was assessed by a global cognition score, which included episodic memory, visuospatial  
41 abilities, and executive function. A linear mixed model was developed to explore the repeated  
42 measurements.

43 Results: During the seven-year follow-up, we observed 610 (4.6%) participants experienced the first  
44 stroke. The baseline mean (SD) age was 58.6 (9.2) years. 47.3% of them were male. There was no  
45 difference in the baseline cognitive function and decline rate of pre-stroke cognition between stroke  
46 survivors and stroke-free participants after adjusting for covariates. Among the stroke survivors, the  
47 acute decline was -0.123, -0.169, and -0.135 SD/y in cognitive domains of episodic memory,  
48 visuospatial ability, and global cognition, respectively. The executive function did not decline acutely  
49 after stroke. In the years following stroke, the decline rate of executive function was 0.056 SD/y  
50 faster than the rate before stroke. The decline rate of episodic memory, visuospatial ability, and  
51 global cognition did not accelerate after stroke.

52 Conclusion: Before stroke onset, the cognitive function of Chinese stroke survivors was similar to  
53 that of stroke-free participants. Incident stroke was associated with acute decline in global cognition,  
54 episodic memory, and visuospatial abilities, and accelerated decline in orientation, attention, and  
55 calculation abilities. The cognitive trajectories revealed by our study highlights the need to care for  
56 the cognitive decline among Chinese stroke survivors.

57

58

59

60

61

62

63

64

65

66

67

## 68 1 Introduction

69 Dementia or cognitive impairment is common after stroke<sup>1-3</sup>. A meta-analysis conducted in 2021  
70 reported that around 10% to 30% of patients had dementia after stroke<sup>4</sup>. In developed countries,  
71 population ageing coupled with a decline in mortality after stroke is bringing with an even higher  
72 prevalence of post-stroke cognitive impairment (PSCI)<sup>5-7</sup>. Elucidating the cognitive trends pre- and  
73 post- stroke would be helpful to determine impact of acute stroke treatment on cognitive function and  
74 to design health policy to manage the burden of PSCI<sup>8</sup>. However, since most studies were hospital-  
75 based, the trends of cognitive function before stroke remained unclear. Baseline cognition, an  
76 important risk factor, is impossible to measure. Methods such as Informant Questionnaire of  
77 Cognitive Decline in the Elderly (IQCODE) or medical records from health system could achieve  
78 information on pre-stroke cognitive function<sup>9,10</sup>. Nevertheless, they have two important limitations.  
79 The first is recall bias<sup>11</sup>. Second, these data were converted into dichotomous variables. This  
80 prevented researchers from observing the linear trends before and after stroke.

81 Several articles had reported the cognitive trend pre- and post- stroke. A 2015 *JAMA* article included  
82 over twenty thousand England participants, finding that stroke survivors experienced a faster rate of  
83 cognitive decline after stroke than before stroke<sup>12</sup>. A 2021 *STROKE* article examined American  
84 participants from three study epochs, and they further reported the cognitive score of stroke survivors  
85 declined faster even before the stroke, compared with that of the stroke-free participants<sup>13</sup>. To the  
86 best of our knowledge, the cognitive trends mentioned above has not been investigated among  
87 Chinese populations. Furthermore, there is still room for improvement of methods used to calculate  
88 the trend.

89 In 2021, the China Health and Retirement Longitudinal Study (CHARLS), a nationally representative  
90 database, published its fourth survey and offered us the opportunity to explore the cognitive trends  
91 across multiple surveys. Therefore, the aim of our study was to investigate the temporal pattern of  
92 trends in cognitive function before and after stroke among Chinese populations.

## 93 2 Methods

### 94 2.1 Study population

95 CHARLS is a community-based and nationally representative cohort study in China and a sister  
96 study of the Health and Retirement Study (HRS). The baseline (Wave 1) was conducted 2011 and  
97 included 17708 randomly selected Chinese participants from 150 country units distributed in 28  
98 provinces of China via multistage probability sampling<sup>14</sup>. Data from Wave 1 (2011), Wave 2 (2013),  
99 Wave 3 (2015), and Wave 4 (2018) was used in the current analysis.

100 Figure 1 showed the flow chart of sample selection. 16040 individuals completed cognitive tests at  
101 baseline. 352 participants less than 45 at baseline were excluded. We excluded 381 participants with  
102 brain damage or mental retardation and 170 individuals with memory-related disease at baseline. Of  
103 the 15137 remaining participants, 423 with a history of stroke at baseline were excluded. 42  
104 individuals missed covariates at baseline. We retained participants who received at least one  
105 cognitive test during Wave 2 to 4, excluding 1361 participants lost to follow-up. Finally, 610 stroke  
106 survivors and 12701 participants without incident stroke were included<sup>15</sup>.

### 107 2.2 Assessment of cognitive function and stroke

108 Cognitive assessments were conducted in all four waves and included three domains. Its reliability  
109 and validity have been demonstrated in previous studies<sup>16-18</sup>. Immediate and delayed (5 minutes)  
110 recall tests of ten Chinese nouns were used to assess episodic memory. 0.5 points for each correct  
111 word. The score of episodic memory ranged from 0 to 10. Visuospatial ability was assessed by  
112 asking participants to redraw a figure. One score was received for success. The executive function  
113 was assessed by asking participants to repeatedly subtract 7 from 100 and to identify the date, season,  
114 and the day of the week. It assessed participants' ability of calculation, attention, and orientation. The  
115 score for executive function could range from 0 to 10<sup>19</sup>.

116 We created z-scores for each test using the mean and SD of scores at baseline. The global cognition z  
117 scores were created by standardizing the sum of the three individual z-scores in the same manner<sup>20</sup>.

118 We evaluated stroke as a modifier of the association between neighborhood and mortality. The first  
119 stroke was based on a time-updated self- or proxy-report of a doctor's diagnosis ("Has a doctor ever  
120 told you that you had a stroke?"). No information on transient ischemic attacks, stroke subtypes, or  
121 stroke severity was available. For some stroke participants, the diagnosis time was recorded by  
122 interview. For others, the time was defined as the midpoint between the date of the last wave without  
123 stroke history and that of the wave reporting a stroke history.

### 124 **2.3 Covariates**

125 Covariates related to stroke and cognitive function were selected, including age, sex, education,  
126 marital status, residential area, smoking, drinking, hypertension, dyslipidemia, diabetes, cancer, lung  
127 diseases, heart problems, depression, and the number of instrumental activities of daily living  
128 IADLs<sup>15</sup>. Education was classified as illiterate, primary school, middle school, and high school, and  
129 above. Marital status was classified married and the other status. The 10-item Center for  
130 Epidemiologic Studies Short Depression Scale (CES-D-10) was used to measure depressive  
131 symptoms. This score can range from 0 to 30. A score  $\geq 12$  was defined as depression<sup>21</sup>.

### 132 **2.4 Statistical analysis**

133 Baseline characteristics and baseline cognitive scores were compared between participants who did  
134 and did not experience a stroke during the follow-up, and between those included in the analysis and  
135 those who lost to follow-up.

136 Linear mixed models were used to fit the trends of cognitive function. It accounts for between-group  
137 variation and within-group correlation of repeated outcomes<sup>22,23</sup>. In model A, random effects were  
138 estimated for intercept and time since baseline. Fixed effects were estimated for intercept, time (years  
139 since baseline), stroke (yes or no), time\*stroke interaction, stroke status (yes or no), and covariates.  
140 Intercept and time variables showed the baseline cognition and cognitive change rate of those without  
141 stroke, respectively. The coefficient of the "stroke" variable accounts for the baseline difference  
142 between those who did and did not experience a stroke during the follow-up. The stroke\*time  
143 interaction evaluated the difference cognitive change rates of participants with and without stroke.  
144 The "stroke status" was a time-varying dichotomies variable, changed from "0" to "1" at the time of  
145 stroke onset, reflecting the acute cognitive decline after stroke. Random effects were estimated for  
146 intercept and time. Model B included variates in Model A and added stroke\*stroke status\*time-after-  
147 stroke interaction. Time after stroke were fitted for both fixed effects and random effects. This  
148 interaction indicated changes in cognitive slope before and after stroke. Then, the stroke\*time  
149 interaction reflected the difference between the rate of change from baseline to incident stroke and  
150 that from baseline to end of follow-up<sup>24</sup>.

151 We calculated participant-specific predicted scores for a 70-year-old female with the most common  
152 baseline characteristics (Figure 2). Random effects were set to zero.

153 P values were 2-sided, with 0.05 being the threshold for statistical significance. All analyses were  
154 performed using SAS version 9.4 (SAS Institute Inc., Cary, NC, USA).

## 155 **2.5 Sensitivity analysis**

156 In sensitivity analysis, we restricted our subjects to participants (both with and without stroke) who  
157 received tests in all four waves, this more closely showed the trends in relatively healthier. We  
158 included participants who experienced a stroke before baseline<sup>12</sup>.

## 159 **3 Results**

160 Among the 13311 participants who were included in the main analysis, 610 (4.6%) experienced at  
161 least one incident stroke during the seven-year follow-up. The baseline characteristics was shown in  
162 Table 1. The mean  $\pm$  age of individuals without incidence stroke was  $58.6 \pm 9.2$  years. 47.3% of  
163 them were male. 66.4% of them hadn't finished middle school. 78.8% lived in rural areas.

164 Compared with participants without incident stroke, those with incident stroke were older; had a high  
165 number of IADLs; had higher percentages of unmarried, smoking, drinking, hypertension,  
166 dyslipidemia, diabetes, lung disease, heart problems, and depression. There was no difference in sex  
167 proportions between the two groups. After adjusting for age and sex, the stroke group tended to live  
168 in rural areas. The stroke group had lower cognitive scores in all domains. After adjustment for age  
169 and sex, there was no significant difference in baseline cognitive function between participants with  
170 and without incident stroke.

171 Following our hypothesis mentioned above, the model reflected these trajectories of cognitive  
172 function: (1) the predicted baseline score of the without-stroke group (Intercept), (2) the decline rate  
173 of the without-stroke group (Slope), (3) the difference in baseline score (Difference in intercept), (4)  
174 the difference in decline rate in the stroke group compared to the without-stroke group in the pre-  
175 stroke period (Difference in slope before stroke), (5) the acute cognitive change after stroke among  
176 the stroke group, and (6) how much the decline rate change after stroke among the stroke group.

177 As shown in Table 2 and Figure 2, there was no difference in the baseline cognitive scores between  
178 the two groups. For individuals who remained stroke-free, their cognitive scores consistently  
179 declined in all cognitive domains. Likewise, the cognitive function of participants with stroke  
180 declined before stroke onset. The decline rates were similar across the two groups. Therefore, we  
181 hadn't observed pre-stroke cognitive disadvantage of people with stroke compared to people without  
182 stroke.

183 The acute cognitive decline after score was shown in Table 2 and the vertical line in Figure 2. Stroke  
184 survivors showed a significantly acute decline in episodic memory ( $\beta$ , -0.123 SD; 95% CI, -0.176, -  
185 0.70;  $P=0.021$ ; Model B), visuospatial ability ( $\beta$ , -0.169 SD; 95% CI, -0.232, -0.106;  $P=0.007$ ; Model  
186 B), and global cognition ( $\beta$ , -0.135 SD; 95% CI, -0.183, -0.135;  $P=0.004$ ; Model B). We did not  
187 detect acute cognitive decline after incident stroke in executive function ( $\beta$ , -0.056 SD; 95% CI, -  
188 0.103, -0.010;  $P=0.230$ ; Model B).

189 In the years following stroke, all cognitive domains declined over time (Figure 3). Executive function  
190 declined 0.045 SD/y faster than it did before stroke ( $\beta$ , -0.045 SD; 95% CI, -0.059, -0.031;  $P=0.001$ ;

191 Model B). No accelerated decline rate was observed in episodic memory, visuospatial ability, or  
192 global cognition, compared with the pre-stroke rate.

193 We conducted sensitivity analysis after excluding participants who didn't receive cognitive tests in  
194 all four waves and included participants with baseline stroke, respectively. The results remained  
195 similar.

#### 196 **4 Discussion**

197 In this national cohort of Chinese participants aged  $\geq 45$  years, we observed an accelerated cognitive  
198 decline in global cognition after stroke. There was no significant difference in baseline cognition and  
199 pre-stroke cognitive decline rate between participants with and without stroke. For episodic memory  
200 abilities, visuospatial abilities, and global cognition, stroke patients experienced an acute cognitive  
201 decline at the time of stroke and showed the same decline rate compared with their pre-stroke rate.  
202 For calculation, orientation, and attention abilities, stroke participants didn't show an immediate  
203 cognitive decrement at stroke onset but experienced a steeper cognitive decline in the long term after  
204 stroke.

205 Our results were partly in agreement with the findings from other ethnicities. To the best of our  
206 knowledge, only participants from two countries were examined the cognitive trajectories before and  
207 after stroke. Reasons for Geographic and Racial Differences in Stroke (REGARDS)<sup>12,25</sup> and English  
208 Longitudinal Study of Ageing (ELSA)<sup>15</sup>, namely, were from the UK. Health and Retirement Study  
209 (HRS)<sup>13,26,27</sup> and Chicago Health and Aging Project (CHAP)<sup>26</sup>, namely, were from America. The  
210 cognitive tests in REGARDS assessed the following function: recall and temporal orientation, new  
211 learning, verbal memory, and executive function. A study from the REGARDS reported acute  
212 cognitive decline and persistent cognitive decline in recall and temporal orientation, and verbal  
213 memory abilities. New learning abilities declined acutely after stroke but remained a same change  
214 rate after stroke compared with the pre-stroke rate. Consistent with our results, the executive function  
215 of their participants didn't decline immediately at the time of stroke, but experienced accelerated  
216 cognitive decline but no persistent cognitive decline in hadn't examined the difference in the pre-  
217 stroke cognitive decline between participants with incident stroke and the natural cognitive decline  
218 among control group<sup>12</sup>. The ELSA tested three cognitive domains, including memory, semantic  
219 fluency, and orientation. For UK participants in ELSA, all cognitive domains declined acutely at  
220 stroke onset and declined faster in the long periods after stroke. HRS only tested memory abilities  
221 and reported similar findings. The Americans in HRS experienced an acute cognitive decrement  
222 immediately after stroke. The decline rate after stroke was not significantly faster than that before  
223 stroke<sup>13,27</sup>. CHAP reported an accelerated cognitive decline in the years after stroke. However, the  
224 authors didn't consider the effect of acute cognitive decline, which would lead to bias<sup>26</sup>. Usage of z-  
225 score makes results across studies comparable. The acute cognitive decline in memory among the  
226 Chinese population (-0.123 SD) was similar to that among UK population (-0.150 SD), and less than  
227 that among the American population in Epoch 3 of HRS (-0.25 SD)<sup>13,15</sup>.

228 A key difference between our participants and the English in ELSA or the Americans in HRS lied on  
229 the baseline cognitive scores and the pre-stroke cognitive trend. Studies using ELSA and HRS found  
230 stroke survivors had lower baseline cognition and faster cognitive decline before stroke, compared  
231 with the stroke-free participants. This is different from our findings in all cognitive domains. The  
232 study learning HRS analyzed stroke survivors, stroke decedents, and stroke-free group, separately.  
233 Not surprisingly, the pre-stroke cognitive decline rate was much faster among stroke decedents<sup>13</sup>.  
234 This might be due to that stroke patients have higher comorbidity of cardiovascular risk factors, such

235 as hypertension, diabetes, and atherosclerosis, during quite a significant time before stroke onset.  
236 These risk factors could accelerate cognitive decline even after they were adjusted in the multiple  
237 regression<sup>28</sup>. Most of our stroke participants were “stroke survivors” (only 12 of them died during the  
238 follow-up). Nevertheless, stroke survivors in HRS also had lower pre-stroke cognitive scores. The  
239 study learning ELSA hadn’t taken the effect of fatal stroke into account<sup>15</sup>. We don’t know whether  
240 the results would change after considering the subgroup.

241 The acute cognitive decline could be explained by mechanisms of cognitive impairment in the acute  
242 and subacute stage of stroke, including infarction of the brain tissue, hypoperfusion, and “misery  
243 perfusion”, which was represented by decreased cerebral blood flow and increased oxygen extraction  
244 fraction in areas distal to the lesions<sup>11,29,30</sup>. Mechanisms explaining the long-term cognitive decline  
245 after stroke remained to be elucidated. Incident stroke could trigger or accelerate the Alzheimer-  
246 disease-related pathologies, such as amyloid deposition<sup>31</sup>. And, neurodegeneration ahead of stroke  
247 could exacerbate the brain injury after stroke<sup>32,33</sup>. Stroke survivors had a higher prevalence of  
248 hypertension, diabetes, and atrial fibrillations. The vascular-related comorbidities and immune  
249 response contributed to the cognitive deficits after stroke<sup>28,34</sup>. Cerebral small vessel disease, reflected  
250 by whiter matter hyperintensity, lacune, perivascular space, and microbleeds, was associated with  
251 greater cognitive decline in general cognition<sup>35,36</sup>. Recurrent stroke, clinical or subclinical, might  
252 increase the risk of dementia in the long term after stroke<sup>3,32</sup>. However, we didn’t have the image data  
253 at the stroke onset and follow-up waves.

254 The most advantage of this article was our study population. We firstly reported how the cognitive  
255 trajectories differed before and after incident stroke among Chinese participants. Previous studies  
256 learning only stroke survivors missed pre-stroke cognitive tests and might not generalize to the  
257 Chinese population. In recent years, the mortality of stroke in China is decreasing due to improved  
258 medical technology and treatment<sup>37,38</sup>, for example, the growing use of tissue-type plasminogen  
259 activator(r-tPA) and standard therapy. Now China have over 300 Comprehensive Stroke Centers and  
260 over 1000 Tertiary Stroke Centers. In recent decades, a growing number of observational studies and  
261 reports have reported the prevalence and types of cognitive or emotional disfunctions after stroke in  
262 developing countries<sup>39</sup>. In this regard, studies in China are dedicated to not only motor dysfunction,  
263 but also complications such as cognitive decline. The cognitive trajectories revealed by our study  
264 highlights the needs to care the acute cognitive decline in cognitive function among Chinese stroke  
265 survivors. Compared with the previous studies, we also improved the usage of linear mixed models.  
266 Our models considered the trajectories of stroke-free group and stroke group simultaneously.

267 However, our study had several limitations. The first limitation was the lack of medical records,  
268 leading to a serious of deficits. We were unable to differentiate stroke subtypes, including cerebral  
269 infarction, intracerebral hemorrhage, and transient ischemic attacks. Since ischemic stroke accounts  
270 for approximately 80% of stroke, our results more likely reflected conditions in ischemic stroke  
271 survivors. Furthermore, the self-reported or the investigator-reported stroke status would introduce  
272 recall bias. An American study showed self- and proxy- reported stroke history had about a  
273 sensitivity of 74% and a specificity of 93% to detect stroke<sup>40</sup>. The situation in our cohort was  
274 unknown. To compare the pre- and post- stroke cognitive trend, specificity, which was much higher,  
275 was more important than sensitivity. Some of our participants lack data on recurrent stroke, which  
276 prevented us to conduct sensitivity analysis. Insufficient data on stroke severity, location, or acute  
277 treatment prevented us from controlling for more factors<sup>9</sup>. Second, our cohort didn’t record the cause  
278 of death. Hence, we were unable to identify stroke decedents from those who suffered a stroke and  
279 soon died in one wave. Participants who experienced a severe stroke or was aphasia after stroke were  
280 more likely to die or drop out, and they tended to have poorer health status at baseline. This might

281 reduce our ability to detect the full effects of stroke on cognitive trends, especially trends before  
282 stroke<sup>41</sup>. Third, although we controlled for quite a number of confounders, we cannot rule out the  
283 possibility of residual confounders, such as atrial fibrillation, body mass index (BMI), and  
284 Apolipoprotein E (APOE) genotype<sup>42</sup>.

## 285 **5 Conclusion**

286 Our study added to the understanding of the cognitive trajectories after stroke among Chinese stroke  
287 patients. It highlighted the need for improved cognitive assessment in stroke trials. Future studies  
288 could learn the mechanisms for the acute and accelerated long-term cognitive decline, and explore  
289 modifiable risk factors and effective interventions to reduce the cognitive burden after stroke.

290

291

292

293

294

295

296

297

298

299

300

301

302

303

304

305

306

307

308

309



310

311 **6 Tables**

312 **6.1 Table 1. Baseline characteristics of participants with or without incident stroke during**  
 313 **follow-up**

314

|                                 | No incident stroke<br>(n = 12701) | Incident stroke<br>(n = 610) | P Value <sup>a</sup> | Adjusted P value <sup>b</sup> |
|---------------------------------|-----------------------------------|------------------------------|----------------------|-------------------------------|
| Continuous variables, mean (SD) |                                   |                              |                      |                               |
| Age                             | 58.6 (9.2)                        | 61.0 (8.8)                   | <0.001               | -                             |
| Number of IADLs                 | 0.2 (0.6)                         | 0.3 (0.8)                    | <0.001               | <0.001                        |
| Global cognition scores         | 10.6 (4.3)                        | 10.0 (4.1)                   | <0.001               | 0.114                         |
| Episodic memory scores          | 3.3 (1.9)                         | 3.1 (1.8)                    | <0.001               | 0.452                         |
| Visuospatial ability scores     | 0.6 (0.5)                         | 0.6 (0.5)                    | 0.0033               | 0.054                         |
| Executive function scores       | 6.6 (2.8)                         | 6.3 (2.9)                    | <0.001               | 0.109                         |
| Categorical variables, n (%)    |                                   |                              |                      |                               |
| Males                           | 5925 (47.3)                       | 290 (48.3)                   | 0.335                | -                             |
| Education                       |                                   |                              | <0.001               | 0.247                         |
| Illiterate                      | 3293 (26.3)                       | 173 (28.8)                   |                      |                               |
| Primary school                  | 5026 (40.1)                       | 258 (42.9)                   |                      |                               |
| Middle school                   | 2665 (21.3)                       | 104 (17.3)                   |                      |                               |
| High school and above           | 1556 (12.4)                       | 66 (11.0)                    |                      |                               |
| Marital status                  |                                   |                              | <0.001               | <0.001                        |
| Married                         | 11156 (89.0)                      | 520 (86.5)                   |                      |                               |
| Other status                    | 1384 (11.0)                       | 81 (13.5)                    |                      |                               |
| Residential area                |                                   |                              | 0.285                | 0.002                         |
| Urban                           | 2660 (21.2)                       | 122 (20.3)                   |                      |                               |
| Rural                           | 9880 (78.8)                       | 479 (79.7)                   |                      |                               |
| Current smoking                 | 4861 (38.8)                       | 254 (42.3)                   | <0.001               | <0.001                        |
| Current drinking                | 3201 (25.2)                       | 165 (27.5)                   | 0.034                | <0.001                        |
| Hypertension                    | 2731(21.8)                        | 245 (40.8)                   | <0.001               | <0.001                        |
| Dyslipidemia                    | 1041 (8.30)                       | 89 (14.8)                    | <0.001               | <0.001                        |
| Diabetes                        | 633 (5.1)                         | 51 (8.5)                     | <0.001               | <0.001                        |
| Cancer                          | 111 (0.9)                         | 3 (0.5)                      | 0.0462               | 0.0790                        |
| Lung Diseases                   | 1228 (9.8)                        | 68 (11.3)                    | 0.015                | <0.001                        |
| Heart problems                  | 1384 (11.4)                       | 107 (17.8)                   | <0.001               | <0.001                        |
| Depression                      | 2579 (20.6)                       | 165 (27.5)                   | <0.001               | <0.001                        |

315 <sup>a</sup>Calculated using ANOVA for continuous covariates and  $\chi^2$  test for categorical covariates.

316 <sup>b</sup>Calculated using generalized linear models for continuous covariates and logistic regression for  
 317 categorical covariates, after adjustment for baseline age and sex.



319 **6.2 Table 2. Trajectories of cognitive function among all participants from 2011 and 2018<sup>a</sup>**

320

| Variables                                      | Global cognition           |        |                            |        | Episodic memory            |        |                            |        | Visuospatial ability       |        |                            |        | Executive function         |        |                            |        |
|------------------------------------------------|----------------------------|--------|----------------------------|--------|----------------------------|--------|----------------------------|--------|----------------------------|--------|----------------------------|--------|----------------------------|--------|----------------------------|--------|
|                                                | Model A                    |        | Model B                    |        | Model A                    |        | Model B                    |        | Model A                    |        | Model B                    |        | Model A                    |        | Model B                    |        |
|                                                | β<br>(95% CI)              | P      | β<br>(95% CI)              | P      | β<br>(95% CI)              | P      | β<br>(95% CI)              | P      | β<br>(95% CI)              | P      | β<br>(95% CI)              | P      | β<br>(95% CI)              | P      | β<br>(95% CI)              | P      |
| Baseline age                                   | -0.018<br>(-0.020, -0.017) | <0.001 | -0.018<br>(-0.020, -0.017) | <0.001 | -0.021<br>(-0.023, -0.020) | <0.001 | -0.021<br>(-0.023, -0.020) | <0.001 | -0.012<br>(-0.013, -0.011) | <0.001 | -0.012<br>(-0.013, -0.011) | <0.001 | -0.009<br>(-0.010, -0.007) | <0.001 | -0.009<br>(-0.010, -0.007) | <0.001 |
| Intercept of without-stroke group              | 0.221<br>(0.114, 0.328)    | <0.001 | 0.221<br>(0.115, 0.328)    | <0.001 | 0.540<br>(0.435, 0.646)    | <0.001 | 0.541<br>(0.435, 0.647)    | <0.001 | 0.213<br>(0.107, 0.318)    | <0.001 | 0.212<br>(0.107, 0.318)    | <0.001 | 0.174<br>(0.072, 0.277)    | <0.001 | 0.175<br>(0.073, 0.278)    | <0.001 |
| Difference in intercept <sup>b</sup>           | 0.017<br>(-0.048, 0.082)   | 0.606  | 0.017<br>(-0.050, 0.085)   | 0.613  | 0.059<br>(-0.012, 0.130)   | 0.106  | 0.045<br>(-0.030, 0.119)   | 0.241  | -0.002<br>(-0.077, 0.074)  | 0.969  | 0.014<br>(-0.065, 0.093)   | 0.736  | 0.012<br>(-0.050, 0.074)   | 0.700  | -0.021<br>(-0.087, 0.044)  | 0.520  |
| Slope of without-stroke group                  | -0.032<br>(-0.035, -0.030) | <0.001 | -0.032<br>(-0.035, -0.030) | <0.001 | -0.013<br>(-0.016, -0.010) | <0.001 | -0.013<br>(-0.016, -0.010) | <0.001 | -0.037<br>(-0.041, -0.034) | <0.001 | -0.037<br>(-0.041, -0.034) | <0.001 | -0.050<br>(-0.052, -0.048) | <0.001 | -0.050<br>(-0.052, -0.048) | <0.001 |
| Difference in slope before stroke <sup>c</sup> | -0.005<br>(-0.023, 0.011)  | 0.507  | -0.006<br>(-0.026, 0.014)  | 0.556  | -0.010<br>(-0.030, 0.009)  | 0.295  | -0.004<br>(-0.026, 0.018)  | 0.731  | -0.001<br>(-0.023, 0.022)  | 0.948  | -0.008<br>(-0.032, 0.017)  | 0.546  | -0.008<br>(-0.025, 0.008)  | 0.308  | 0.008<br>(-0.011, 0.027)   | 0.422  |
| Acute change after stroke <sup>d</sup>         | -0.138<br>(-0.227, -0.049) | 0.002  | -0.135<br>(-0.228, -0.042) | 0.004  | -0.139<br>(-0.239, -0.039) | 0.006  | -0.123<br>(-0.227, -0.019) | 0.021  | -0.143<br>(-0.258, -0.029) | 0.014  | -0.169<br>(-0.292, -0.047) | 0.007  | -0.086<br>(-0.176, 0.004)  | 0.060  | -0.056<br>(-0.148, 0.035)  | 0.230  |
| Changes in slope after stroke                  | None                       | None   | -0.003<br>(-0.035, 0.029)  | 0.857  | None                       | None   | -0.019<br>(-0.052, 0.014)  | 0.257  | None                       | None   | 0.022<br>(-0.017, 0.062)   | 0.271  | None                       | None   | -0.045<br>(-0.073, -0.017) | 0.001  |
| Log likelihood                                 | -47397.5                   |        | -47396.35                  |        | -57312.65                  |        | -57310.1                   |        | -58379.45                  |        | -58377.15                  |        | -53,235.95                 |        | -53,227.95                 |        |

321

\*All coefficients and confidence intervals were shown in the form of z score.

322

<sup>a</sup>Adjusted for baseline age (shown in Line “Baseline age”), sex, education, marital status, residential area, current smoking, current drinking, hypertension, dyslipidemia, diabetes, cancer, lung diseases, heart problems, depression, and number of IADLs.

323

<sup>b</sup>The difference in intercept in the stroke group compared to the without-stroke group.

324

<sup>c</sup>The difference in slope rate in the stroke group during pre-stroke period compared to the without-stroke group during the whole follow-up period.

325

326

<sup>d</sup>The amount the cognitive scores changed at the “stroke point” among the stroke group, measured as the first post-stroke value minus the last pre-stroke value.

327

328 <sup>6.3</sup> **Table 3. Changes in slope after incident stroke compared with slope before incident**  
329 **stroke<sup>a,b</sup>**

330

|                      | $\beta$ (95% CI)         | P value |
|----------------------|--------------------------|---------|
| Global cognition     | -0.074 (-0.093, -0.054)* | <0.001  |
| Episodic memory      | -0.043 (-0.063, -0.023)  | 0.034   |
| Visuospatial ability | 0.027 (0.005, 0.049)     | 0.215   |
| Executive function   | -0.061 (-0.078, -0.045)  | <0.001  |

331 \*All coefficients and confidence intervals were shown in the form of z score.

332 <sup>a</sup>Adjusted for age, sex, education, marital status, residential area, current smoking, current drinking,  
333 hypertension, dyslipidemia, diabetes, cancer, lung diseases, heart problems, depression, and number  
334 of IADLs.

335 <sup>b</sup>The coefficient reflected the amount of the slope changed after incident stroke among the stroke  
336 group.

337

338

339

340

341

342

343 **7 Figure legends**

344 **Figure 1. Flow chart of participant selection.**

345 **Figure 2. Predicted changes in cognitive z scores among all participants during the follow-up.**

346 The black dotted curves represented participants without incident stroke. The red dashed curves  
347 represented the pre-stroke cognitive trajectories among participants with incident stroke. The red  
348 sloid curves represented the post-stroke trajectories. The predicted values of cognitive score were  
349 calculated for a 70-year-old female. Her education level was primary school. She lived in rural area,  
350 and was married, but without current smoking, current drinking, hypertension, dislipidiemia, diabetes,  
351 cancer, lung diseases, heart problems, or depression. Her IADL score was zero. She experienced one  
352 incident stroke at the end of the third year.

353 **8 Conflict of Interest**

354 The authors declare that the research was conducted in the absence of any commercial or financial  
355 relationships that could be construed as a potential conflict of interest.

356 **9 Author Contributions**

357 Jianian Hua contributed to the conception and design of the study. Jianian Hua and Yueping Shen  
358 organized the database. Jianian Hua and Jianye Dong performed the statistical analysis. Jianian Hua  
359 and Jianye Dong wrote the first draft of the manuscript. Yueping Shen reviewed the manuscript. All  
360 authors approved the final version of the paper.

361 **10 Funding**

362 **11 Acknowledgements**

363 We thank the China Center for Economic Research and the National School of Development of  
364 Peking University for providing the data.

365 **12 Data Availability Statement**

366 The data used in this manuscript from the China Health and retirement Longitudinal Study  
367 (CHARLS). We applied the permission for the data access (<http://charls.pku.edu.cn/zh-CN>) and got  
368 the access to use it. Prof. Yaohui Zhao (National School of Development of Peking University), John  
369 Strauss (University of Southern California), and Gonghuan Yang (Chinese Center for Disease  
370 Control and Prevention) are the principal investigators.

371

372

373

374

375

376

377

378

379

380

381 **13 References**

- 382 1. Seshadri S, Wolf PA. Lifetime risk of stroke and dementia: current concepts, and estimates  
383 from the Framingham Study. *Lancet Neurol.* 2007;6(12):1106-1114.
- 384 2. Sun JH, Tan L, Yu JT. Post-stroke cognitive impairment: epidemiology, mechanisms and  
385 management. *Ann Transl Med.* 2014;2(8):80.
- 386 3. Pendlebury ST, Rothwell PM. Prevalence, incidence, and factors associated with pre-stroke  
387 and post-stroke dementia: a systematic review and meta-analysis. *Lancet Neurol.*  
388 2009;8(11):1006-1018.
- 389 4. Craig L, Hoo ZL, Yan TZ, Wardlaw J, Quinn TJ. Prevalence of dementia in ischaemic or  
390 mixed stroke populations: systematic review and meta-analysis. *J Neurol Neurosurg*  
391 *Psychiatry.* 2021.
- 392 5. Feigin VL, Krishnamurthi RV, Parmar P, Norrving B, Mensah GA, Bennett DA, Barker-  
393 Collo S, Moran AE, Sacco RL, Truelsen T, Davis S, Pandian JD, Naghavi M, Forouzanfar  
394 MH, Nguyen G, Johnson CO, Vos T, Meretoja A, Murray CJ, Roth GA, Group GBDW,  
395 Group GBDSPE. Update on the Global Burden of Ischemic and Hemorrhagic Stroke in 1990-  
396 2013: The GBD 2013 Study. *Neuroepidemiology.* 2015;45(3):161-176.
- 397 6. Rothwell PM, Coull AJ, Giles MF, Howard SC, Silver LE, Bull LM, Gutnikov SA, Edwards  
398 P, Mant D, Sackley CM, Farmer A, Sandercock PA, Dennis MS, Warlow CP, Bamford JM,  
399 Anslow P, Oxford Vascular S. Change in stroke incidence, mortality, case-fatality, severity,  
400 and risk factors in Oxfordshire, UK from 1981 to 2004 (Oxford Vascular Study). *Lancet.*  
401 2004;363(9425):1925-1933.
- 402 7. Rothwell PM, Coull AJ, Silver LE, Fairhead JF, Giles MF, Lovelock CE, Redgrave JN, Bull  
403 LM, Welch SJ, Cuthbertson FC, Binney LE, Gutnikov SA, Anslow P, Banning AP, Mant D,  
404 Mehta Z, Oxford Vascular S. Population-based study of event-rate, incidence, case fatality,  
405 and mortality for all acute vascular events in all arterial territories (Oxford Vascular Study).  
406 *Lancet.* 2005;366(9499):1773-1783.
- 407 8. Bejot Y, Aboa-Eboule C, Durier J, Rouaud O, Jacquin A, Ponavoy E, Richard D, Moreau T,  
408 Giroud M. Prevalence of early dementia after first-ever stroke: a 24-year population-based  
409 study. *Stroke.* 2011;42(3):607-612.
- 410 9. Yatawara C, Ng KP, Chander R, Kandiah N. Associations between lesions and domain-  
411 specific cognitive decline in poststroke dementia. *Neurology.* 2018;91(1):e45-e54.
- 412 10. Harrison JK, Fearon P, Noel-Storr AH, McShane R, Stott DJ, Quinn TJ. Informant  
413 Questionnaire on Cognitive Decline in the Elderly (IQCODE) for the diagnosis of dementia  
414 within a secondary care setting. *Cochrane Database Syst Rev.* 2015(3):CD010772.
- 415 11. Gottesman RF, Hillis AE. Predictors and assessment of cognitive dysfunction resulting from  
416 ischaemic stroke. *Lancet Neurol.* 2010;9(9):895-905.
- 417 12. Levine DA, Kabeto M, Langa KM, Lisabeth LD, Rogers MA, Galecki AT. Does Stroke  
418 Contribute to Racial Differences in Cognitive Decline? *Stroke.* 2015;46(7):1897-1902.
- 419 13. Eng CW, Mayeda ER, Gilsanz P, Whitmer RA, Kim AS, Glymour MM. Temporal Trends in  
420 Stroke-Related Memory Change: Results From a US National Cohort 1998-2016. *Stroke.*  
421 2021:Strokeaha120031063.

- 422 14. Zhao Y, Hu Y, Smith JP, Strauss J, Yang G. Cohort profile: the China Health and Retirement  
423 Longitudinal Study (CHARLS). *Int J Epidemiol.* 2014;43(1):61-68.
- 424 15. Zheng F, Yan L, Zhong B, Yang Z, Xie W. Progression of cognitive decline before and after  
425 incident stroke. *Neurology.* 2019;93(1):e20-e28.
- 426 16. Hua J, Zhuang S, Shen Y, Tang X, Sun H, Fang Q. Exploring the Bidirectional Associations  
427 Between Short or Long Sleep Duration and Lower Cognitive Function: A 7-Year Cohort  
428 Study in China. *Front Aging Neurosci.* 2021;13:727763.
- 429 17. Hua J, Qiao Y, Ke C, Shen Y. Higher visit-to-visit total cholesterol variability is associated  
430 with lower cognitive function among middle-aged and elderly Chinese men. *Sci Rep.*  
431 2020;10(1):15555.
- 432 18. Meng Q, Wang H, Strauss J, Langa KM, Chen X, Wang M, Qu Q, Chen W, Kuang W, Zhang  
433 N, Li T, Wang Y, Zhao Y. Validation of neuropsychological tests for the China Health and  
434 Retirement Longitudinal Study Harmonized Cognitive Assessment Protocol. *Int*  
435 *Psychogeriatr.* 2019;31(12):1709-1719.
- 436 19. Hua J, Zhuang S, Shen Y, Tang X, Sun H, Fang Q. Exploring the Bidirectional Associations  
437 Between Short or Long Sleep Duration and Lower Cognitive Function: A 7-Year Cohort  
438 Study in China. 2021(1663-4365 (Print)).
- 439 20. Power MC, Rawlings A, Sharrett AR, Bandeen-Roche K, Coresh J, Ballantyne CM, Pokharel  
440 Y, Michos ED, Penman A, Alonso A, Knopman D, Mosley TH, Gottesman RF. Association  
441 of midlife lipids with 20-year cognitive change: A cohort study. *Alzheimers Dement.*  
442 2018;14(2):167-177.
- 443 21. Hua J, Zhuang S, Shen Y, Tang X, Sun H, Fang Q. Exploring the Bidirectional Associations  
444 Between Short or Long Sleep Duration and Lower Cognitive Function: A 7-Year Cohort  
445 Study in China. (1663-4365 (Print)).
- 446 22. West BT. *Linear Mixed Models: A Practical Guide Using Statistical Software.* 2007.
- 447 23. Laird NM, Ware JH. Random-effects models for longitudinal data. *Biometrics.*  
448 1982;38(4):963-974.
- 449 24. E Margaret Warton KPNCDoR. Time After Time: Difference-in-Differences and Interrupted  
450 Time Series Models in SAS. *SAS GLOBAL FORUM.* 2020.
- 451 25. Levine DA, Wadley VG, Langa KM, Unverzagt FW, Kabeto MU, Giordani B, Howard G,  
452 Howard VJ, Cushman M, Judd SE, Galecki AT. Risk Factors for Poststroke Cognitive  
453 Decline: The REGARDS Study (Reasons for Geographic and Racial Differences in Stroke).  
454 *Stroke.* 2018;49(4):987-994.
- 455 26. Rajan KB, Aggarwal NT, Wilson RS, Everson-Rose SA, Evans DA. Association of cognitive  
456 functioning, incident stroke, and mortality in older adults. *Stroke.* 2014;45(9):2563-2567.
- 457 27. Wang Q, Capistrant BD, Ehntholt A, Glymour MM. Long-term rate of change in memory  
458 functioning before and after stroke onset. *Stroke.* 2012;43(10):2561-2566.
- 459 28. Zlokovic BV, Gottesman RF, Bernstein KE, Seshadri S, McKee A, Snyder H, Greenberg SM,  
460 Yaffe K, Schaffer CB, Yuan C, Hughes TM, Daemen MJ, Williamson JD, Gonzalez HM,  
461 Schneider J, Wellington CL, Katusic ZS, Stoeckel L, Koenig JI, Corriveau RA, Fine L, Galis  
462 ZS, Reis J, Wright JD, Chen J. Vascular contributions to cognitive impairment and dementia  
463 (VCID): A report from the 2018 National Heart, Lung, and Blood Institute and National



- 464 Institute of Neurological Disorders and Stroke Workshop. *Alzheimers Dement.*  
465 2020;16(12):1714-1733.
- 466 29. Baron JC, Bousser MG, Rey A, Guillard A, Comar D, Castaigne P. Reversal of focal "misery-  
467 perfusion syndrome" by extra-intracranial arterial bypass in hemodynamic cerebral ischemia.  
468 A case study with 15O positron emission tomography. *Stroke.* 1981;12(4):454-459.
- 469 30. Suter OC, Sunthorn T, Kraftsik R, Straubel J, Darekar P, Khalili K, Miklossy J. Cerebral  
470 hypoperfusion generates cortical watershed microinfarcts in Alzheimer disease. *Stroke.*  
471 2002;33(8):1986-1992.
- 472 31. Garcia-Alloza M, Gregory J, Kuchibhotla KV, Fine S, Wei Y, Ayata C, Frosch MP,  
473 Greenberg SM, Bacskai BJ. Cerebrovascular lesions induce transient beta-amyloid  
474 deposition. *Brain.* 2011;134(Pt 12):3697-3707.
- 475 32. Mok VC, Lam BY, Wong A, Ko H, Markus HS, Wong LK. Early-onset and delayed-onset  
476 poststroke dementia - revisiting the mechanisms. *Nat Rev Neurol.* 2017;13(3):148-159.
- 477 33. Whitehead SN, Cheng G, Hachinski VC, Cechetto DF. Progressive increase in infarct size,  
478 neuroinflammation, and cognitive deficits in the presence of high levels of amyloid. *Stroke.*  
479 2007;38(12):3245-3250.
- 480 34. Sarfo FS, Akinyemi R, Howard G, Howard VJ, Wahab K, Cushman M, Levine DA, Ogunniyi  
481 A, Unverzagt F, Owolabi M, Ovbiagele B. Vascular-brain Injury Progression after Stroke  
482 (VIPS) study: concept for understanding racial and geographic determinants of cognitive  
483 decline after stroke. *J Neurol Sci.* 2020;412:116754.
- 484 35. Hamilton OKL, Cox SR, Okely JA, Conte F, Ballerini L, Bastin ME, Corley J, Taylor AM,  
485 Page D, Gow AJ, Munoz Maniega S, Redmond P, Valdes-Hernandez MDC, Wardlaw JM,  
486 Deary IJ. Cerebral small vessel disease burden and longitudinal cognitive decline from age 73  
487 to 82: the Lothian Birth Cohort 1936. *Transl Psychiatry.* 2021;11(1):376.
- 488 36. Kalaria RN. Cerebrovascular disease and mechanisms of cognitive impairment: evidence  
489 from clinicopathological studies in humans. *Stroke.* 2012;43(9):2526-2534.
- 490 37. Wang W, Wang D, Liu H, Sun H, Jiang B, Ru X, Sun D, Chen Z, Wang Y. Trend of  
491 declining stroke mortality in China: reasons and analysis. *Stroke Vasc Neurol.* 2017;2(3):132-  
492 139.
- 493 38. Ouk M, Wu CY, Colby-Milley J, Fang J, Zhou L, Shah BR, Herrmann N, Lanctot KL,  
494 Linkewich E, Law M, Swartz RH, Kapral MK, Black SE, MacIntosh BJ, Edwards JD,  
495 Swardfager W. Depression and Diabetes Mellitus Multimorbidity Is Associated With Loss of  
496 Independence and Dementia Poststroke. *Stroke.* 2020;51(12):3531-3540.
- 497 39. Cox SR, Lyall DM, Ritchie SJ, Bastin ME, Harris MA, Buchanan CR, Fawns-Ritchie C,  
498 Barbu MC, de Nooij L, Reus LM, Alloza C, Shen X, Neilson E, Alderson HL, Hunter S,  
499 Liewald DC, Whalley HC, McIntosh AM, Lawrie SM, Pell JP, Tucker-Drob EM, Wardlaw  
500 JM, Gale CR, Deary IJ. Associations between vascular risk factors and brain MRI indices in  
501 UK Biobank. *Eur Heart J.* 2019;40(28):2290-2300.
- 502 40. Osypuk TL, Ehntholt A, Moon JR, Gilsanz P, Glymour MM. Neighborhood Differences in  
503 Post-Stroke Mortality. *Circ Cardiovasc Qual Outcomes.* 2017;10(2).
- 504 41. Salthouse TA. Selectivity of attrition in longitudinal studies of cognitive functioning. *J*  
505 *Gerontol B Psychol Sci Soc Sci.* 2014;69(4):567-574.

506 42. Mok V, Wong A, Tang WK, Lam WW, Fan YH, Richards PS, Wong KT, Ahuja AT, Wong  
507 KS. Determinants of prestroke cognitive impairment in stroke associated with small vessel  
508 disease. *Dement Geriatr Cogn Disord*. 2005;20(4):225-230.

509

**17708** individuals were interviewed in the first wave (Wave 1) of CHARLS during 2011-2012

**16040** individuals completed cognitive tests in Wave 1

**903** Excluded

- **352** Less than 45 years age at baseline
- **381** Brain damage/mental retardation
- **170** Memory-related disease

**15137** individuals in Wave 1

**1826** Excluded

- **423** History of stroke
- **42** No baseline covariates
- **1361** Lost to follow-up from Wave 2 to Wave 4

**13311** individuals included in main analysis

- **12701** with no incident stroke
- **610** with incident stroke

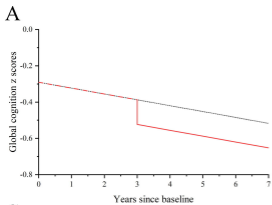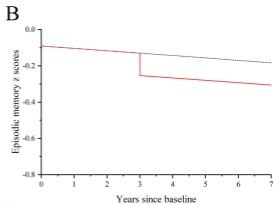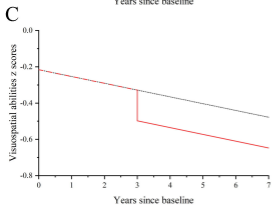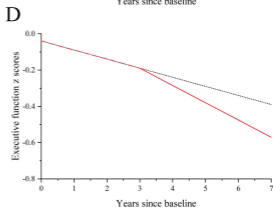

Source: https://medrxiv.org/content/10.1101/2021.09.24.21263136v2.full.pdf
